# Supplementary material for: Green silver nanoparticles: enhanced antimicrobial and antibiofilm activity with effects on DNA replication and cell cytotoxicity
Source: Royal Society of Chemistry journal article supplement (doi:10.1039/c4ra08791g), 2014-01-01
Supplement: c4ra08791g1.pdf [file c4ra08791g1.pdf]

**Figure ESI S1 . Effect of plant extract on PCR efficiency of 16s rRNA gene.** M, marker; (Thermo Scientific ; Gene 1kb plus ladder; Cat No. #SM1333)C, control; lane 1 was 8 mg/ml; lane 2 was 4 mg/ml; lane 3 was 2mg/ml; lane 4 was 1mg/ml ; lane 5 was .5mg/ml Plant extract (35 cycles.).

**Figure ESI S2 .UV-visible spectra of AgNPs after 24 h and 90 days.** The spectra showed the stability of the formed AgNPs after 90days.
